# Supplementary material for: Monitoring salt reduction in processed foods in Australia
Source: MDPI journal article supplement (doi:10.3390/ijms23126631), 2008-01-01
Supplement: s1 [file s1]

## Supplementary materials

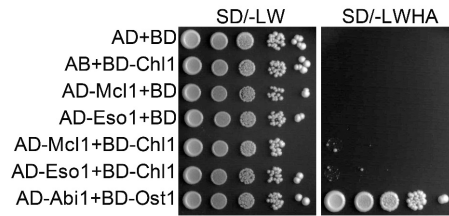

**Figure S1.** Chl1 does not interact with Mcl1 or Eso1. The interaction of Chl1 with Mcl1 or Eso1 was detected by Y2H. Tenfold serial dilutions of transformants were spotted on SD/-Leu-Trp media (control) and SD/-Leu-Trp-His-Ade media. The interaction between Abi1 and Ost1 is a contrast.

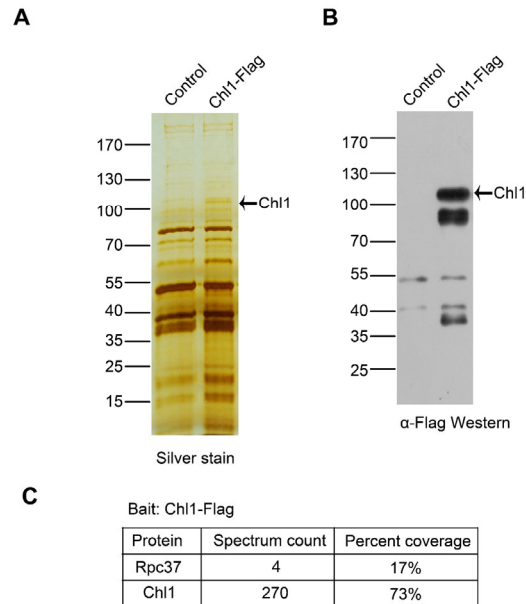

**Figure S2.** Characterization of the Chl1-Flag complex. (A) The purified Chl1-Flag complex was separated with 10% SDS PAGE gels for silver staining, an untagged strain served as contrast. (B) A portion of each sample from A was used for Western blot analysis with Flag antibody. (C) Affinity-purified Chl1-Flag complex and control material were used for Mass spectrometry analyses. The number of peptides and the percentage of Rpc37 and Chl1 that these peptides cover were presented.

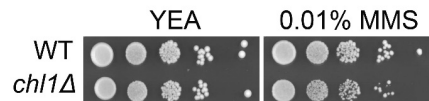

**Figure S3.** The *chl1Δ* strain is less sensitive to DNA damaging agent. Tenfold serial dilutions of strains were spotted on YEA medium containing the indicated concentration of DNA damaging agent.
